# Supplementary material for: Altered profile of immune regulatory cells in the peripheral blood of lymphoma patients
Source: PubMed Central journal article supplement (PMC6449984; doi:10.1186/s12885-019-5529-0), 2019-04-05
Supplement: 12885_2019_5529_MOESM2_ESM.pdf [file 12885_2019_5529_MOESM2_ESM.pdf]

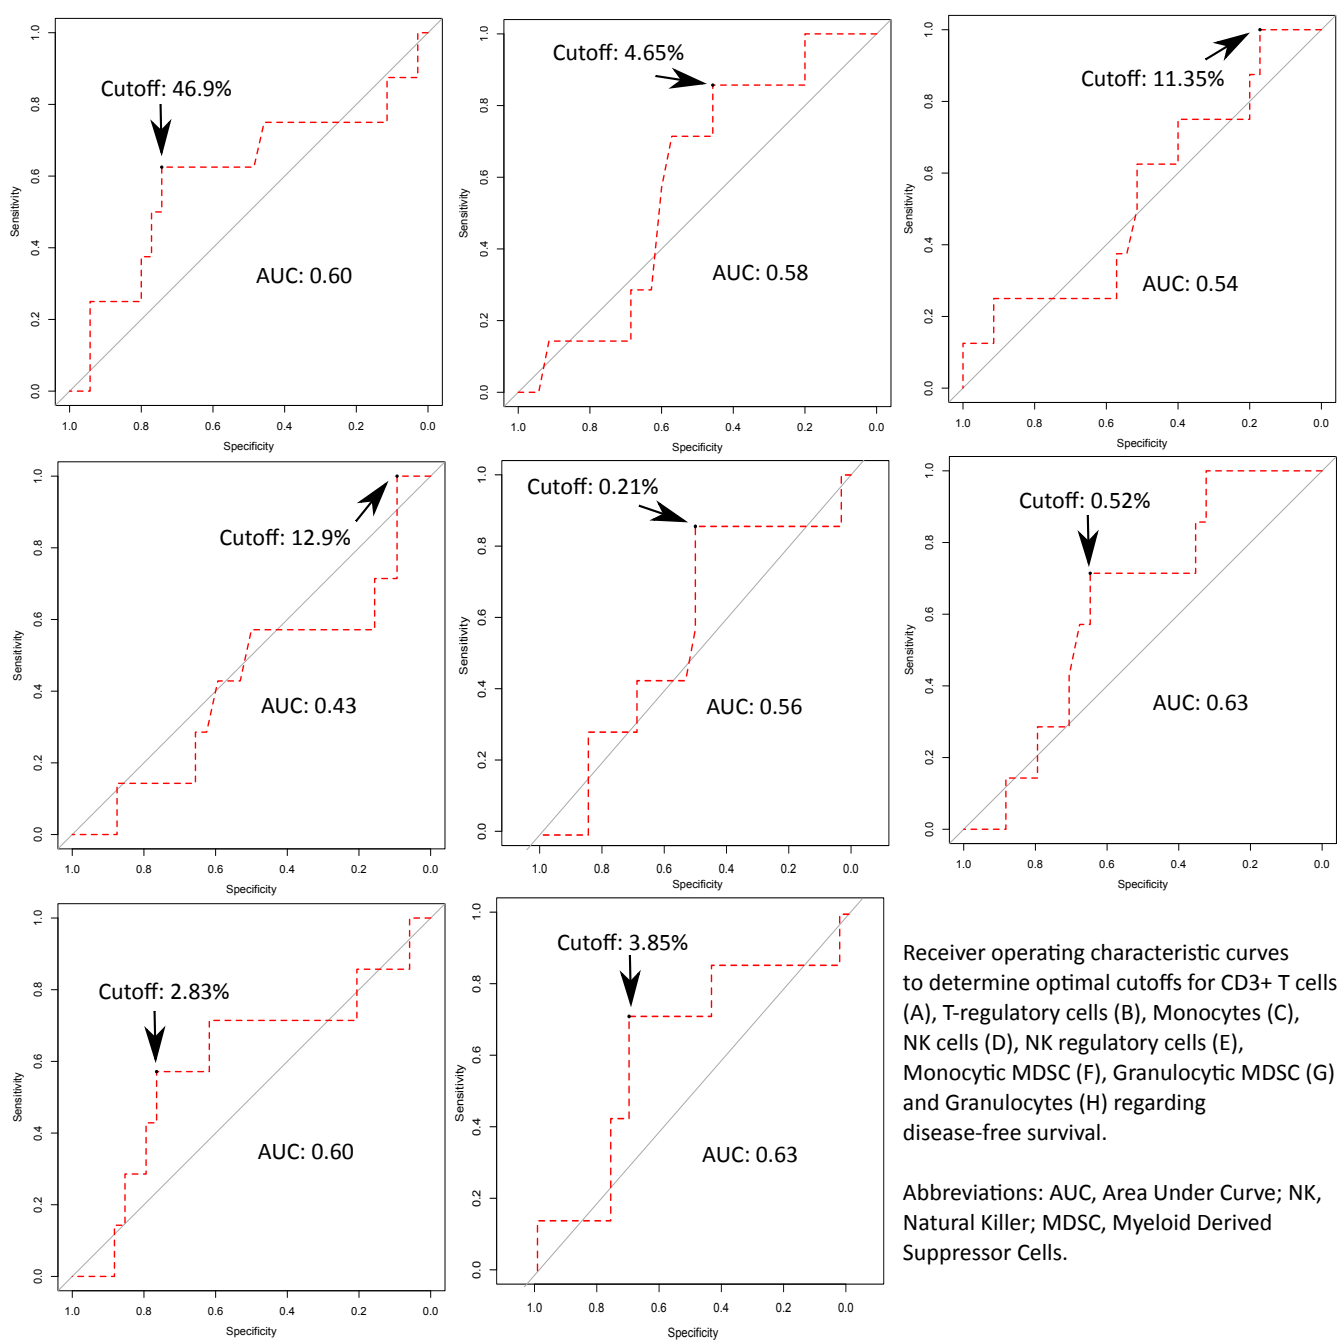

Receiver operating characteristic curves to determine optimal cutoffs for CD3+ T cells (A), T-regulatory cells (B), Monocytes (C), NK cells (D), NK regulatory cells (E), Monocytic MDSC (F), Granulocytic MDSC (G) and Granulocytes (H) regarding disease-free survival.

Abbreviations: AUC, Area Under Curve; NK, Natural Killer; MDSC, Myeloid Derived Suppressor Cells.
